# Supplementary material for: Biochemical characterization of INTS3 and C9ORF80, two subunits of hNABP1/2 heterotrimeric complex in nucleic acid binding
Source: Oxford University Press journal article supplement (doi:10.1042/bcj20170351), 2017-11-18
Supplement: bcj-2017-0351_supp.pdf [file bcj-2017-0351_supp.pdf]

**Table S2: Peptide identification by mass spectrometric in-gel digestion analysis of INTS3 band  
(Corresponding to 110 kDa on SDS-PAGE, amino acid coverage: 65.3%)**

| #  | Sequence                    | Protein Group Accessions | Modifications                         | Parent Charge | Parent Mass to Charge Ratio (m/z) (Da) |
|----|-----------------------------|--------------------------|---------------------------------------|---------------|----------------------------------------|
| 1  | AAASGAAGGGGGGAGAGAPGGGR     | Q68E01                   |                                       | 2             | 806.3853                               |
| 2  | AALSSPR                     | Q68E01                   |                                       | 2             | 351.2026                               |
| 3  | ACQEDDVR                    | Q68E01                   |                                       | 2             | 496.7103                               |
| 4  | CDLIR                       | Q68E01                   |                                       | 2             | 338.6771                               |
| 5  | CmSIVTsmTAGVSER             | Q68E01                   | m:Oxidized methionine                 | 3             | 554.2525                               |
| 6  | DELEER                      | Q68E01                   |                                       | 2             | 395.6834                               |
| 7  | DGmNIVLNK                   | Q68E01                   | m:Oxidized methionine                 | 2             | 510.2635                               |
| 8  | DIIHNPQ                     | Q68E01                   |                                       | 2             | 418.7181                               |
| 9  | DLALVSR                     | Q68E01                   |                                       | 2             | 387.2303                               |
| 10 | EAnDALNAYVCK                | Q68E01                   | n:Deamidated                          | 2             | 684.8197                               |
| 11 | EANDALNAYVCK                | Q68E01                   |                                       | 3             | 456.5484                               |
| 12 | EKPSEEmVK                   | Q68E01                   | m:Oxidized methionine                 | 3             | 364.8488                               |
| 13 | EWVLK                       | Q68E01                   |                                       | 2             | 337.6981                               |
| 14 | FHPIK                       | Q68E01                   |                                       | 2             | 321.1942                               |
| 15 | FLACR                       | Q68E01                   |                                       | 2             | 333.6742                               |
| 16 | GAAAAAASGAAGGGGGGAGAGAPGGGR | Q68E01                   |                                       | 2             | 976.9698                               |
| 17 | HDELLAEHIK                  | Q68E01                   |                                       | 3             | 402.2185                               |
| 18 | IIEPVSmEmDNHmSDK            | Q68E01                   | m:Oxidized methionine                 | 3             | 647.2655                               |
| 19 | IIEPVSmEmDnHmSDK            | Q68E01                   | m:Oxidized methionine<br>n:Deamidated | 3             | 647.5988                               |
| 20 | ILTEPAQAQK                  | Q68E01                   |                                       | 2             | 549.8131                               |
| 21 | INQILmEK                    | Q68E01                   | m:Oxidized methionine                 | 2             | 502.7764                               |
| 22 | INQILMEk                    | Q68E01                   | k:Carbamylated lysine                 | 2             | 516.2829                               |
| 23 | INQILMEK                    | Q68E01                   |                                       | 2             | 494.7798                               |
| 24 | InQILmEK                    | Q68E01                   | n:Deamidated<br>m:Oxidized methionine | 2             | 503.2734                               |
| 25 | InQILMEK                    | Q68E01                   | n:Deamidated                          | 2             | 495.2799                               |

|    |                               |        |                       |   |          |
|----|-------------------------------|--------|-----------------------|---|----------|
| 26 | INQILMEK                      | Q68E01 | k:Carbamylated lysine | 2 | 516.2829 |
| 27 | LAPLFDNPK                     | Q68E01 |                       | 2 | 507.7853 |
| 28 | LDESLR                        | Q68E01 |                       | 2 | 366.7    |
| 29 | LLFmTSR                       | Q68E01 | m:Oxidized methionine | 2 | 442.2395 |
| 30 | LLLSTSLDAK                    | Q68E01 |                       | 2 | 530.8173 |
| 31 | LLQNVAR                       | Q68E01 |                       | 2 | 407.2517 |
| 32 | LLQSR                         | Q68E01 |                       | 2 | 308.6944 |
| 33 | LLTTCTSNVAASNAK               | Q68E01 |                       | 2 | 775.8981 |
| 34 | LNLNTNK                       | Q68E01 |                       | 2 | 402.2367 |
| 35 | LQDTCR                        | Q68E01 |                       | 2 | 396.688  |
| 36 | LTPDMETK                      | Q68E01 |                       | 2 | 467.7325 |
| 37 | LTPDmETK                      | Q68E01 | m:Oxidized methionine | 2 | 475.73   |
| 38 | LTPDMETk                      | Q68E01 | k:Carbamylated lysine | 2 | 489.2362 |
| 39 | NATQPPNAEEESGSSSASEEEDTKPKPTK | Q68E01 |                       | 4 | 762.1014 |
| 40 | NNSLPR                        | Q68E01 |                       | 2 | 350.6926 |
| 41 | QYLSTPDSQSLR                  | Q68E01 |                       | 3 | 465.5719 |
| 42 | qYLSTPDSQSLR                  | Q68E01 | q:Pyroglutamic acid   | 2 | 689.3359 |
| 43 | SGVLGADGVCmTFmK               | Q68E01 | m:Oxidized methionine | 2 | 802.8621 |
| 44 | SSDILPR                       | Q68E01 |                       | 2 | 394.2207 |
| 45 | SSLNHIVEK                     | Q68E01 |                       | 3 | 342.8594 |
| 46 | SSPSPPEVK                     | Q68E01 |                       | 2 | 513.7774 |
| 47 | TAGVSER                       | Q68E01 |                       | 2 | 360.1897 |
| 48 | TLILTEPAQAQK                  | Q68E01 |                       | 2 | 656.8798 |
| 49 | TQLVWLVR                      | Q68E01 |                       | 2 | 507.8107 |
| 50 | TSNVAASNAK                    | Q68E01 |                       | 2 | 481.7503 |
| 51 | VAASNAK                       | Q68E01 |                       | 2 | 330.69   |
| 52 | VLAHLAPLFDNPK                 | Q68E01 |                       | 3 | 478.9437 |
| 53 | VLQLQK                        | Q68E01 |                       | 2 | 364.739  |
| 54 | YQDWFQR                       | Q68E01 |                       | 2 | 521.7396 |

**Table S3: Peptide identification by mass spectrometric in-gel digestion analysis of INTS3 band  
(Corresponding to 60 kDa on SDS-PAGE, amino acid coverage: 35.6%)**

| #  | Sequence                    | Protein Group Accessions | Modifications                         | Parent Charge | Parent Mass to Charge Ratio (m/z) (Da) |
|----|-----------------------------|--------------------------|---------------------------------------|---------------|----------------------------------------|
| 1  | AAASGAAGGGGGGAGAGAPGGGR     | Q68E01                   |                                       | 2             | 806.3853                               |
| 2  | AALSSPR                     | Q68E01                   |                                       | 2             | 351.2026                               |
| 3  | ACQEDDVR                    | Q68E01                   |                                       | 2             | 496.7103                               |
| 4  | CDLIR                       | Q68E01                   |                                       | 2             | 338.6771                               |
| 5  | CmSIVTSmTAGVSER             | Q68E01                   | m:Oxidized methionine                 | 3             | 554.2525                               |
| 6  | DELEER                      | Q68E01                   |                                       | 2             | 395.6834                               |
| 7  | DGmNIVLNK                   | Q68E01                   | m:Oxidized methionine                 | 2             | 510.2635                               |
| 8  | DIIHNPQ                     | Q68E01                   |                                       | 2             | 418.7181                               |
| 9  | DLALVSR                     | Q68E01                   |                                       | 2             | 387.2303                               |
| 10 | EAnDALNAYVCK                | Q68E01                   | n:Deamidated                          | 2             | 684.8197                               |
| 11 | EANDALNAYVCK                | Q68E01                   |                                       | 3             | 456.5484                               |
| 12 | EKPSEEmVK                   | Q68E01                   | m:Oxidized methionine                 | 3             | 364.8488                               |
| 13 | EWVLK                       | Q68E01                   |                                       | 2             | 337.6981                               |
| 14 | FHPIK                       | Q68E01                   |                                       | 2             | 321.1942                               |
| 15 | FLACR                       | Q68E01                   |                                       | 2             | 333.6742                               |
| 16 | GAAAAAASGAAGGGGGGAGAGAPGGGR | Q68E01                   |                                       | 2             | 976.9698                               |
| 17 | HDELLAEHIK                  | Q68E01                   |                                       | 3             | 402.2185                               |
| 18 | IIEPVSmEmDNHmSDK            | Q68E01                   | m:Oxidized methionine                 | 3             | 647.2655                               |
| 19 | IIEPVSmEmDnHmSDK            | Q68E01                   | m:Oxidized methionine<br>n:Deamidated | 3             | 647.5988                               |
| 20 | ILTEPAQAQK                  | Q68E01                   |                                       | 2             | 549.8131                               |
| 21 | INQILmEK                    | Q68E01                   | m:Oxidized methionine                 | 2             | 502.7764                               |
| 22 | INQILMEK                    | Q68E01                   | k:Carbamylated lysine                 | 2             | 516.2829                               |
| 23 | INQILMEK                    | Q68E01                   |                                       | 2             | 494.7798                               |
| 24 | InQILmEK                    | Q68E01                   | n:Deamidated<br>m:Oxidized methionine | 2             | 503.2734                               |
| 25 | InQILMEK                    | Q68E01                   | n:Deamidated                          | 2             | 495.2799                               |

|    |                               |        |                       |   |          |
|----|-------------------------------|--------|-----------------------|---|----------|
| 26 | INQILMEk                      | Q68E01 | k:Carbamylated lysine | 2 | 516.2829 |
| 27 | LAPLFDNPK                     | Q68E01 |                       | 2 | 507.7853 |
| 28 | LDESLR                        | Q68E01 |                       | 2 | 366.7    |
| 29 | LLFmTSR                       | Q68E01 | m:Oxidized methionine | 2 | 442.2395 |
| 30 | LLLSTSLDAK                    | Q68E01 |                       | 2 | 530.8173 |
| 31 | LLQNVAR                       | Q68E01 |                       | 2 | 407.2517 |
| 32 | LLQSR                         | Q68E01 |                       | 2 | 308.6944 |
| 33 | LLTTCTSNVAASNAK               | Q68E01 |                       | 2 | 775.8981 |
| 34 | LNLNTNK                       | Q68E01 |                       | 2 | 402.2367 |
| 35 | LQDTCR                        | Q68E01 |                       | 2 | 396.688  |
| 36 | LTPDMETK                      | Q68E01 |                       | 2 | 467.7325 |
| 37 | LTPDmETK                      | Q68E01 | m:Oxidized methionine | 2 | 475.73   |
| 38 | LTPDMETk                      | Q68E01 | k:Carbamylated lysine | 2 | 489.2362 |
| 39 | NATQPPNAEEESGSSSASEEEDTKPKPTK | Q68E01 |                       | 4 | 762.1014 |
| 40 | NNSLPR                        | Q68E01 |                       | 2 | 350.6926 |
| 41 | QYLSTPDSQSLR                  | Q68E01 |                       | 3 | 465.5719 |
| 42 | qYLSTPDSQSLR                  | Q68E01 | q:Pyroglutamic acid   | 2 | 689.3359 |
| 43 | SGVLGADGVCmTFmK               | Q68E01 | m:Oxidized methionine | 2 | 802.8621 |
| 44 | SSDILPR                       | Q68E01 |                       | 2 | 394.2207 |
| 45 | SSLNHIVEK                     | Q68E01 |                       | 3 | 342.8594 |
| 46 | SSPSPPEVK                     | Q68E01 |                       | 2 | 513.7774 |
| 47 | TAGVSER                       | Q68E01 |                       | 2 | 360.1897 |
| 48 | TLILTEPAQAQK                  | Q68E01 |                       | 2 | 656.8798 |
| 49 | TQLVWLVR                      | Q68E01 |                       | 2 | 507.8107 |
| 50 | TSNVAASNAK                    | Q68E01 |                       | 2 | 481.7503 |
| 51 | VAASNAK                       | Q68E01 |                       | 2 | 330.69   |
| 52 | VLAHLAPLFDNPK                 | Q68E01 |                       | 3 | 478.9437 |
| 53 | VLQLQK                        | Q68E01 |                       | 2 | 364.739  |
| 54 | YQDWFQR                       | Q68E01 |                       | 2 | 521.7396 |

**Table S4: Peptide identification by mass spectrometric in-gel digestion analysis of C9ORF80  
(amino acid coverage: 80.7%)**

| #  | Sequence        | Protein Group Accessions | Parent Charge | Parent Mass to Charge Ratio (m/z) (Da) |
|----|-----------------|--------------------------|---------------|----------------------------------------|
| 1  | VAILAELDK       | Q9NRY2                   | 2             | 486.294                                |
| 2  | AILAELDKEK      | Q9NRY2                   | 2             | 565.328                                |
| 3  | LILPVLPR        | Q9NRY2                   | 2             | 460.8208                               |
| 4  | VAILAELDKEK     | Q9NRY2                   | 3             | 410.2454                               |
| 5  | GNLILPVLPR      | Q9NRY2                   | 2             | 546.353                                |
| 6  | ILPVLPR         | Q9NRY2                   | 2             | 404.2774                               |
| 7  | AALQHA          | Q9NRY2                   | 2             | 305.67                                 |
| 8  | AALQHAHAH       | Q9NRY2                   | 3             | 319.1697                               |
| 9  | SIALSR          | Q9NRY2                   | 2             | 323.6992                               |
| 10 | AANSSGQGFQNK    | Q9NRY2                   | 3             | 403.528                                |
| 11 | NSSGQGFQNK      | Q9NRY2                   | 2             | 533.7514                               |
| 12 | AANSSGQGFQNKNR  | Q9NRY2                   | 3             | 493.5774                               |
| 13 | DHAEQQH         | Q9NRY2                   | 2             | 432.6861                               |
| 14 | ILPVLPR         | Q9NRY2                   | 2             | 404.2774                               |
| 15 | HPGASIALSR      | Q9NRY2                   | 2             | 504.783                                |
| 16 | SSTNHPGASIALSR  | Q9NRY2                   | 2             | 699.362                                |
| 17 | HIAAQK          | Q9NRY2                   | 2             | 398.229                                |
| 18 | PGASIALSR       | Q9NRY2                   | 2             | 436.2549                               |
| 19 | QHIAAQK         | Q9NRY2                   | 2             | 462.2581                               |
| 20 | ANSSGQGFQNK     | Q9NRY2                   | 2             | 569.2695                               |
| 21 | ILPVLPR         | Q9NRY2                   | 2             | 404.2774                               |
| 22 | AALQHAH         | Q9NRY2                   | 2             | 374.1996                               |
| 23 | ASIALSR         | Q9NRY2                   | 2             | 359.2183                               |
| 24 | LLMQNQSSTNHPGAS | Q9NRY2                   | 3             | 528.9217                               |
| 25 | STNHPGASIALSR   | Q9NRY2                   | 3             | 437.5677                               |
| 26 | DHAEQQHIAAQ     | Q9NRY2                   | 2             | 624.2934                               |
| 27 | QSSTNHPGASIALSR | Q9NRY2                   | 2             | 763.3917                               |
| 28 | AALQHAHAHSSGY   | Q9NRY2                   | 3             | 450.552                                |
| 29 | DFRDHAEQQHIAAQK | Q9NRY2                   | 4             | 481.2411                               |
| 30 | DHAEQQHIAAQK    | Q9NRY2                   | 2             | 752.3689                               |
| 31 | TNHPGASIALSR    | Q9NRY2                   | 3             | 408.5565                               |

**Table S5: Mass spectrometric analysis of proteins pull down with an anti-hNABP2 antibody**

| <b>Accession</b> | <b>Description</b>                                                                     | <b>Score</b> | <b>Coverage</b> | <b># Peptides</b> | <b>MW [kDa]</b> |
|------------------|----------------------------------------------------------------------------------------|--------------|-----------------|-------------------|-----------------|
| P25398           | 40S ribosomal protein S12                                                              | 4.13         | 15.15           | 2                 | 14.5            |
| P62277           | 40S ribosomal protein S13                                                              | 13.78        | 16.56           | 3                 | 17.2            |
| P62263           | 40S ribosomal protein S14                                                              | 9.99         | 23.84           | 4                 | 16.3            |
| P62244           | 40S ribosomal protein S15a                                                             | 6.31         | 13.85           | 2                 | 14.8            |
| P62249           | 40S ribosomal protein S16                                                              | 22.12        | 47.26           | 7                 | 16.4            |
| P62269           | 40S ribosomal protein S18                                                              | 45.63        | 48.68           | 9                 | 17.7            |
| P39019           | 40S ribosomal protein S19                                                              | 11.3         | 17.93           | 3                 | 16.1            |
| P60866           | 40S ribosomal protein S20                                                              | 5.49         | 19.33           | 2                 | 13.4            |
| P62266           | 40S ribosomal protein S23                                                              | 5.36         | 13.29           | 2                 | 15.8            |
| P62847           | 40S ribosomal protein S24                                                              | 5.82         | 20.3            | 2                 | 15.4            |
| P62851           | 40S ribosomal protein S25                                                              | 4.61         | 8.8             | 2                 | 13.7            |
| P62854           | 40S ribosomal protein S26                                                              | 6.7          | 20.87           | 2                 | 13              |
| P05388           | 60S acidic ribosomal protein P0                                                        | 11.76        | 17.67           | 4                 | 34.3            |
| P05387           | 60S acidic ribosomal protein P2                                                        | 9.17         | 53.04           | 3                 | 11.7            |
| P30050           | 60S ribosomal protein L12                                                              | 10.68        | 24.24           | 3                 | 17.8            |
| P35268           | 60S ribosomal protein L22                                                              | 10.8         | 38.28           | 4                 | 14.8            |
| P62829           | 60S ribosomal protein L23                                                              | 10.08        | 32.14           | 3                 | 14.9            |
| P61353           | 60S ribosomal protein L27                                                              | 4.29         | 12.5            | 2                 | 15.8            |
| P62888           | 60S ribosomal protein L30                                                              | 13.71        | 34.78           | 4                 | 12.8            |
| P62899           | 60S ribosomal protein L31                                                              | 7.07         | 18.4            | 2                 | 14.5            |
| P62910           | 60S ribosomal protein L32                                                              | 7.88         | 20              | 2                 | 15.8            |
| Q9Y3U8           | 60S ribosomal protein L36                                                              | 4.43         | 20              | 2                 | 12.2            |
| P61204           | ADP-ribosylation factor 3                                                              | 9.56         | 19.89           | 3                 | 20.6            |
| P07355           | Annexin A2                                                                             | 5.48         | 8.26            | 2                 | 38.6            |
| O95831           | Apoptosis-inducing factor 1, mitochondrial                                             | 5.24         | 3.92            | 2                 | 66.9            |
| P46063           | ATP-dependent DNA helicase Q1 (RECQ1)                                                  | 4.99         | 3.85            | 2                 | 73.4            |
| Q9H3F6           | BTB/POZ domain-containing adapter for CUL3-mediated RhoA degradation protein 3 (BACD3) | 4.87         | 9.27            | 2                 | 35.4            |
| Q9UJS0           | Calcium-binding mitochondrial carrier protein Aralar2                                  | 7.62         | 6.07            | 3                 | 74.1            |
| Q16630           | Cleavage and polyadenylation specificity factor subunit 6                              | 10.2         | 7.44            | 3                 | 59.2            |
| Q8N684           | Cleavage and polyadenylation specificity factor subunit 7                              | 6.79         | 8.07            | 3                 | 52              |
| Q14258           | E3 ubiquitin/ISG15 ligase TRIM25                                                       | 5.53         | 3.97            | 2                 | 70.9            |
| Q15717           | ELAV-like protein 1                                                                    | 8.44         | 10.43           | 3                 | 36.1            |
| P05198           | Eukaryotic translation initiation factor 2 subunit 1                                   | 6.32         | 11.11           | 3                 | 36.1            |
| P51114           | Fragile X mental retardation syndrome-related protein 1                                | 6.14         | 4.19            | 2                 | 69.7            |
| P08107           | Heat shock 70 kDa protein 1A/1B                                                        | 26.75        | 15.91           | 8                 | 70              |

|        |                                                                             |       |       |    |      |
|--------|-----------------------------------------------------------------------------|-------|-------|----|------|
| P11142 | Heat shock cognate 71 kDa protein                                           | 67.49 | 32.2  | 19 | 70.9 |
| P08238 | Heat shock protein HSP 90-beta                                              | 4     | 3.18  | 2  | 83.2 |
| P09651 | Heterogeneous nuclear ribonucleoprotein A1                                  | 14.97 | 6.99  | 2  | 38.7 |
| P61978 | Heterogeneous nuclear ribonucleoprotein K                                   | 9.17  | 8.21  | 3  | 50.9 |
| P52272 | Heterogeneous nuclear ribonucleoprotein M                                   | 33.5  | 21.64 | 13 | 77.5 |
| O43390 | Heterogeneous nuclear ribonucleoprotein R                                   | 8.56  | 6     | 3  | 70.9 |
| Q9BUJ2 | Heterogeneous nuclear ribonucleoprotein U-like protein 1                    | 4.53  | 4.56  | 2  | 95.7 |
| P22626 | Heterogeneous nuclear ribonucleoproteins A2/B1                              | 13.32 | 17    | 4  | 37.4 |
| P16403 | Histone H1.2                                                                | 4.58  | 11.27 | 2  | 21.4 |
| Q96KK5 | Histone H2A type 1-H                                                        | 10.05 | 21.09 | 3  | 13.9 |
| O60814 | Histone H2B type 1-K                                                        | 12.45 | 13.49 | 3  | 13.9 |
| P62805 | Histone H4                                                                  | 4.44  | 17.48 | 2  | 11.4 |
| Q9NZI8 | Insulin-like growth factor 2 mRNA-binding protein 1                         | 40.47 | 23.92 | 10 | 63.4 |
| O00425 | Insulin-like growth factor 2 mRNA-binding protein 3                         | 39.62 | 26.08 | 11 | 63.7 |
| P19525 | Interferon-induced, double-stranded RNA-activated protein kinase            | 5.24  | 4.54  | 2  | 62.1 |
| Q07666 | KH domain-containing, RNA-binding, signal transduction-associated protein 1 | 6     | 5.42  | 2  | 48.2 |
| Q4G0J3 | La-related protein 7                                                        | 4.9   | 4.3   | 2  | 66.9 |
| Q8N1G4 | Leucine-rich repeat-containing protein 47                                   | 4.81  | 5.15  | 2  | 63.4 |
| Q15233 | Non-POU domain-containing octamer-binding protein                           | 64.65 | 22.29 | 10 | 54.2 |
| Q7Z3B4 | Nucleoporin p54                                                             | 5.02  | 4.34  | 2  | 55.4 |
| Q6P1J9 | Parafibromin                                                                | 4.09  | 3.77  | 2  | 60.5 |
| P11940 | Polyadenylate-binding protein 1                                             | 91.72 | 41.04 | 22 | 70.6 |
| Q13310 | Polyadenylate-binding protein 4                                             | 38.14 | 15.37 | 9  | 70.7 |
| Q6UN15 | Pre-mRNA 3'-end-processing factor FIP1                                      | 4.28  | 5.39  | 2  | 66.5 |
| Q92841 | Probable ATP-dependent RNA helicase DDX17                                   | 25.9  | 16.19 | 10 | 80.2 |
| Q99623 | Prohibitin-2                                                                | 4.87  | 7.02  | 2  | 33.3 |
| Q8NCA5 | Protein FAM98A                                                              | 11.42 | 5.78  | 3  | 55.4 |
| Q9P258 | Protein RCC2                                                                | 6.72  | 6.51  | 3  | 56   |
| Q92734 | Protein TFG                                                                 | 14.19 | 17    | 6  | 43.4 |
| Q13283 | Ras GTPase-activating protein-binding protein 1                             | 38.31 | 21.46 | 7  | 52.1 |
| Q9UN86 | Ras GTPase-activating protein-binding protein 2                             | 22.07 | 13.49 | 5  | 54.1 |
| P27694 | Replication protein A 70 kDa DNA-binding subunit                            | 7.29  | 5.52  | 3  | 68.1 |
| Q96PK6 | RNA-binding protein 14 (RBM14)                                              | 7.23  | 5.83  | 3  | 69.4 |
| A0AV96 | RNA-binding protein 47 (RBM47)                                              | 4.67  | 4.05  | 2  | 64.1 |
| P35637 | RNA-binding protein FUS                                                     | 19.62 | 11.22 | 6  | 53.4 |
| Q13501 | Sequestosome-1                                                              | 23.37 | 24.09 | 6  | 47.7 |
| Q01130 | Serine/arginine-rich splicing factor 2                                      | 6.31  | 11.31 | 2  | 25.5 |



|               |                                                                                   |             |              |          |             |
|---------------|-----------------------------------------------------------------------------------|-------------|--------------|----------|-------------|
| P30153        | Serine/threonine-protein phosphatase 2A 65 kDa regulatory subunit A alpha isoform | 7.55        | 5.26         | 3        | 65.3        |
| Q96HS1        | Serine/threonine-protein phosphatase PGAM5, mitochondrial                         | 4.74        | 6.57         | 2        | 32          |
| P37108        | Signal recognition particle 14 kDa protein                                        | 8.18        | 28.68        | 2        | 14.6        |
| Q9UHB9        | Signal recognition particle subunit SRP68                                         | 4.97        | 3.51         | 2        | 70.7        |
| P62316        | Small nuclear ribonucleoprotein Sm D2                                             | 6.2         | 24.58        | 3        | 13.5        |
| <b>Q9BQ15</b> | <b>SOSS complex subunit B1</b>                                                    | <b>6.82</b> | <b>14.69</b> | <b>2</b> | <b>22.3</b> |
| Q15637        | Splicing factor 1                                                                 | 4.98        | 4.07         | 2        | 68.3        |
| P51571        | Translocon-associated protein subunit delta                                       | 5.03        | 13.87        | 2        | 19          |
| P12956        | X-ray repair cross-complementing protein 6                                        | 41.22       | 30.05        | 15       | 69.8        |
| Q9Y5A9        | YTH domain-containing family protein 2                                            | 5.63        | 4.66         | 2        | 62.3        |

**A**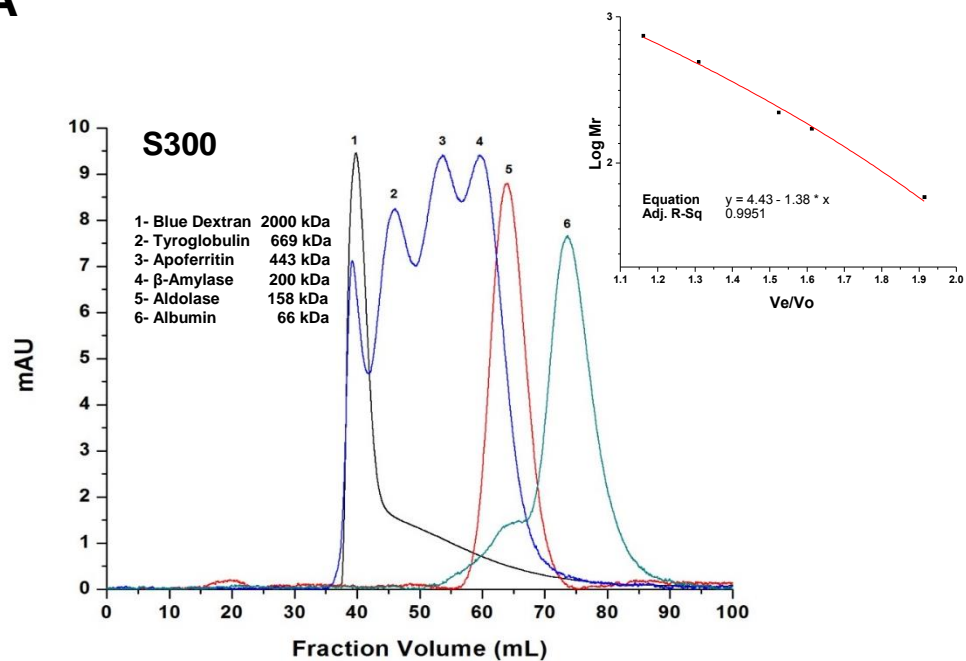**C**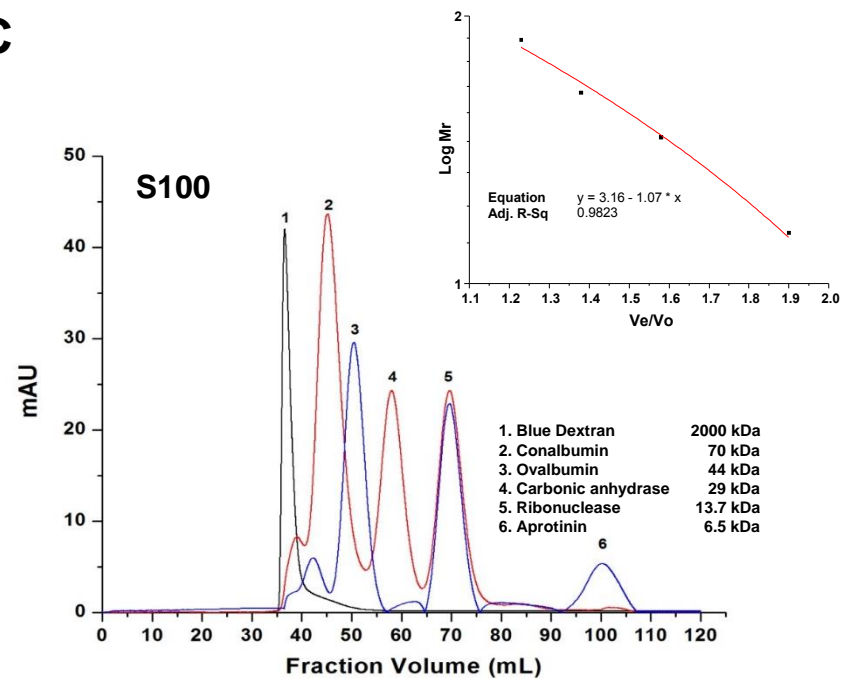**B**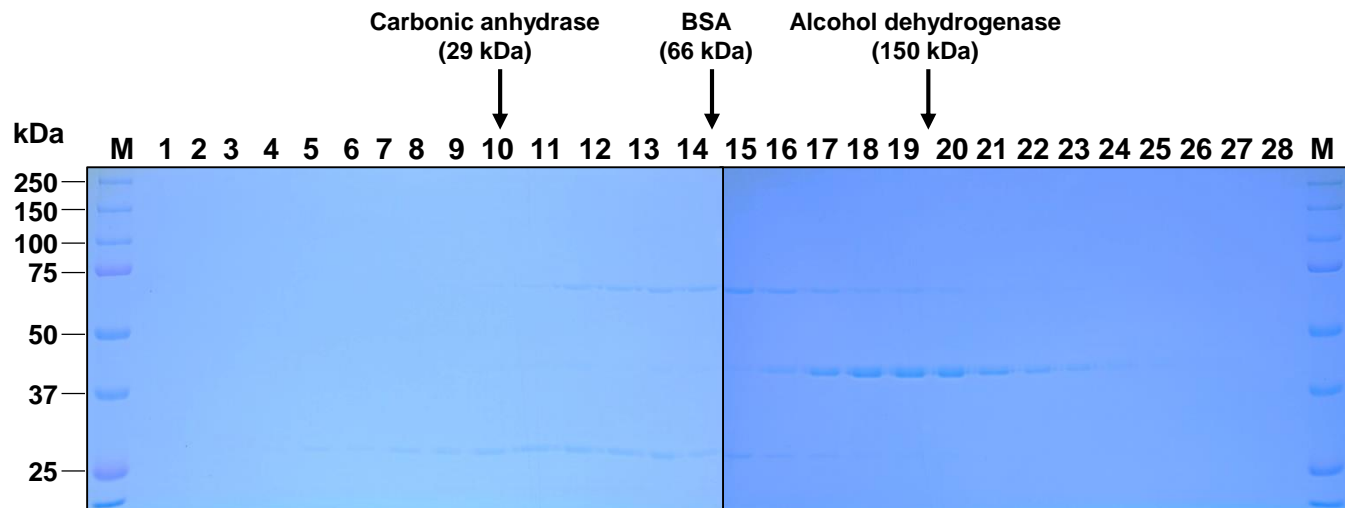**Fig. S1**

**Figure S1.** (A) Calibration of Sephacryl S-300 HR columns with various standard globular proteins and their calibration curve (right top). (B) Coomassie blue stained gels of protein standards (fractions 1-28) collected from sucrose gradient centrifugation. The positions of standards are indicated at the top. Note: Alcohol dehydrogenase is a tetramer containing four equal subunits. (C) Calibration of Sephacryl S-100 HR columns with various standard globular proteins and their calibration curve (right top).

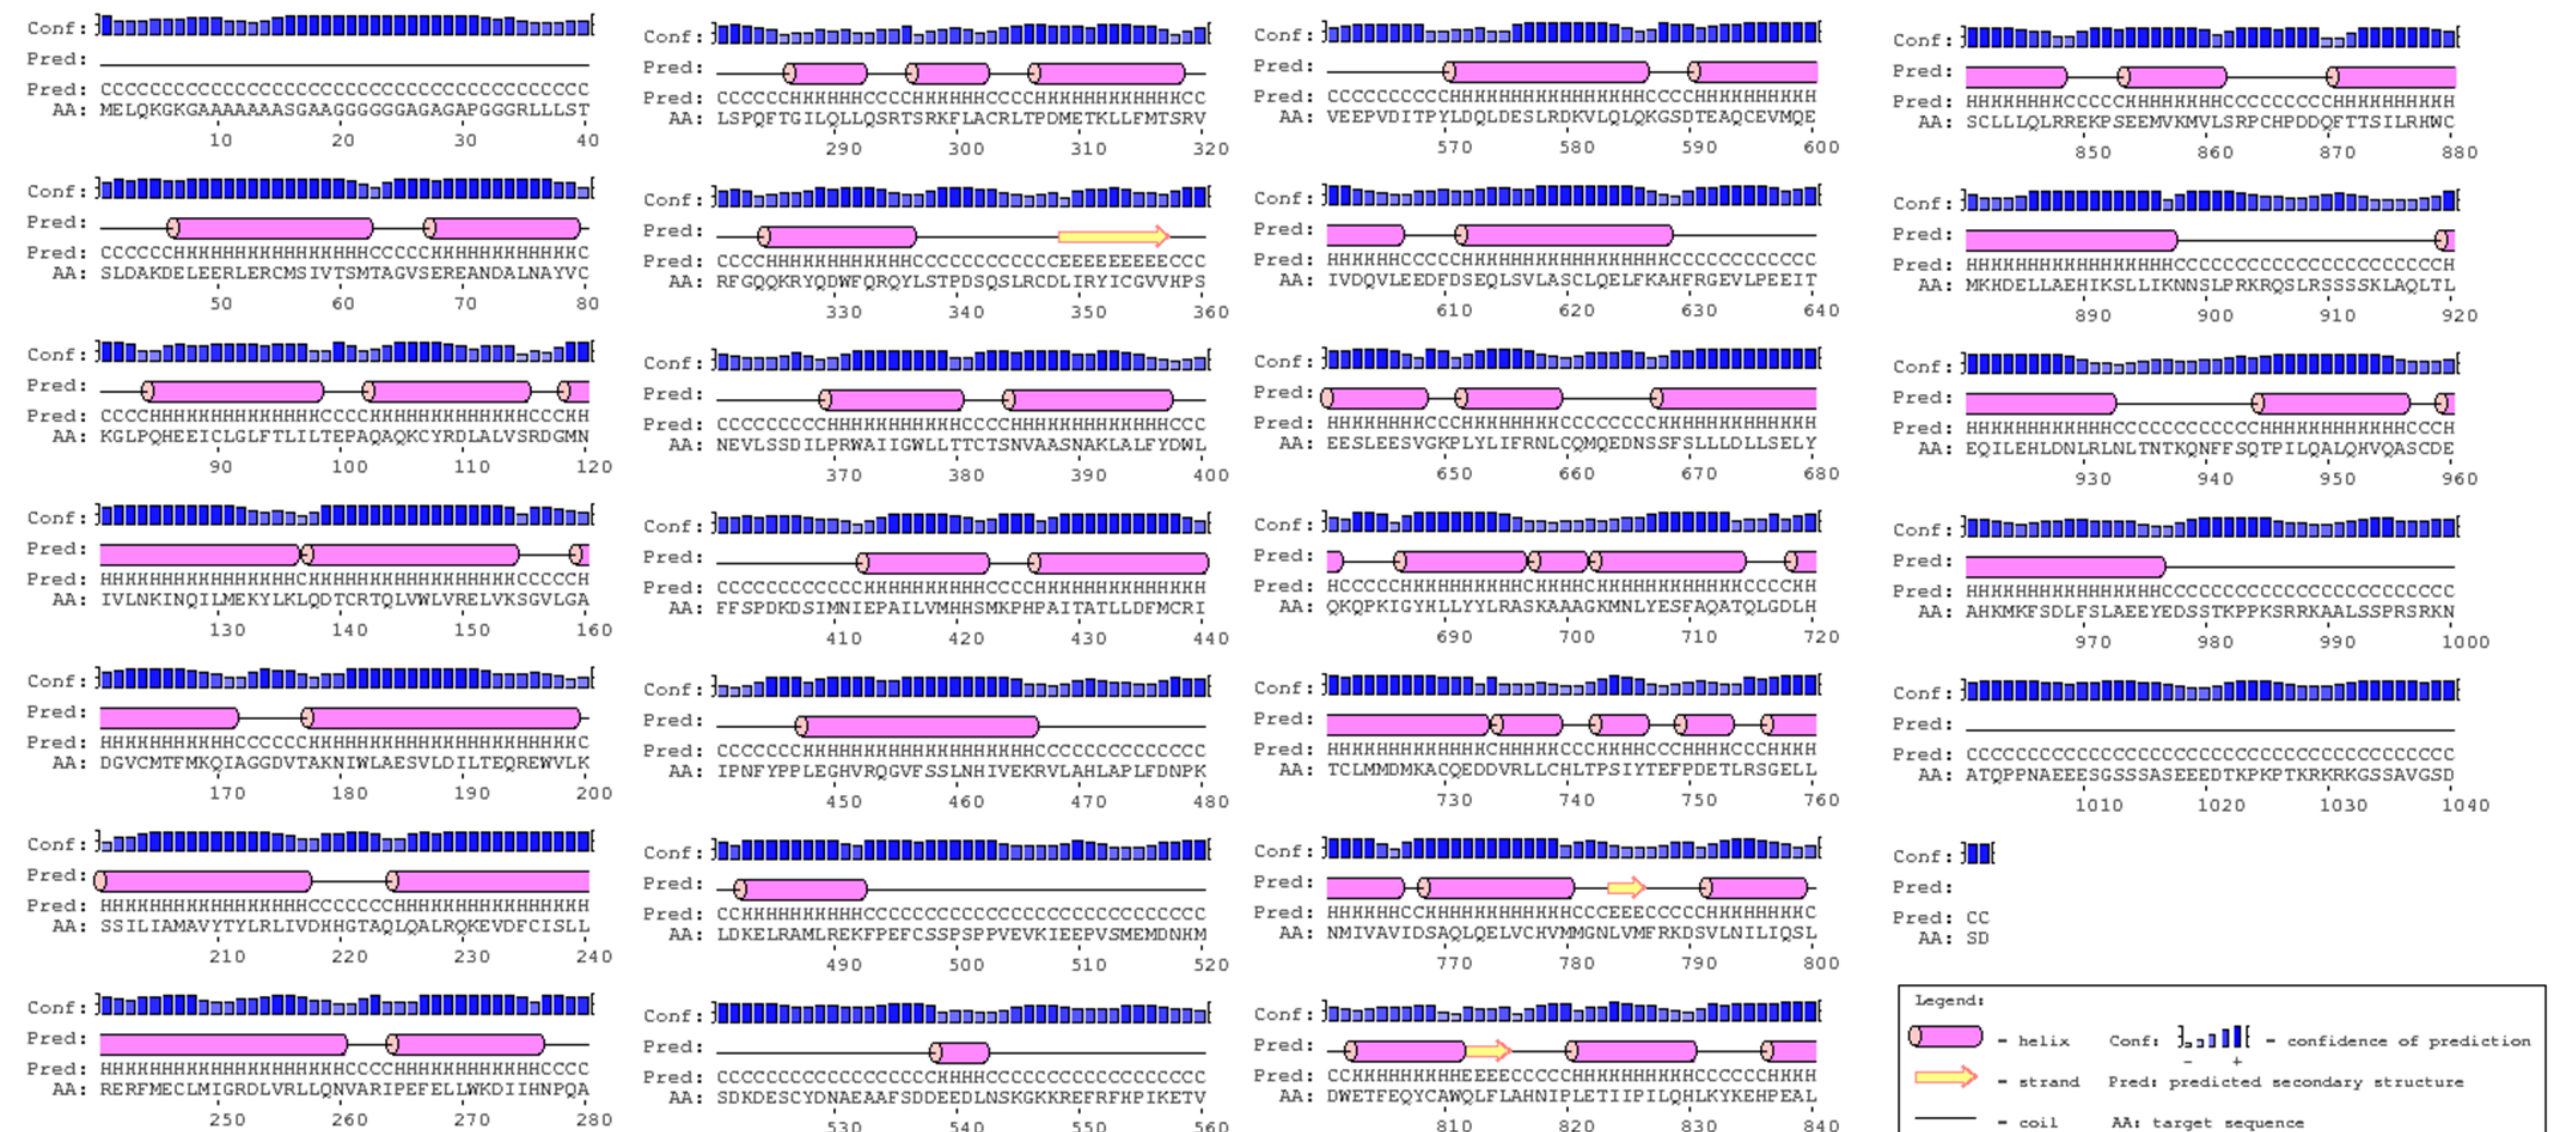

Figure S2. Secondary structure prediction of INTS3<sup>FL</sup> protein by PSIPRED.

**A**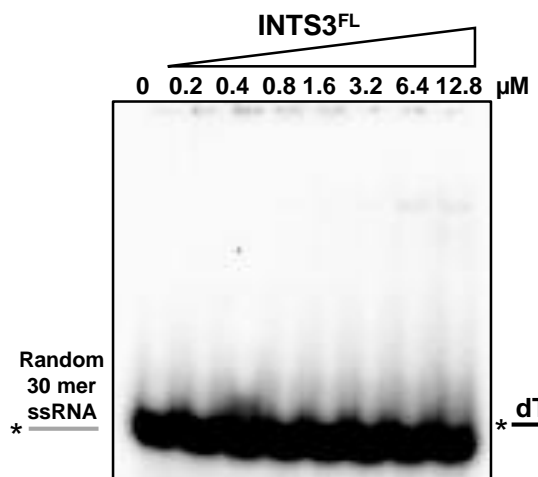**B**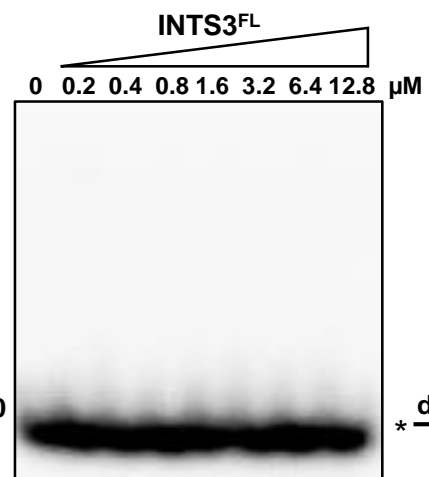**INTS3<sup>FL</sup>**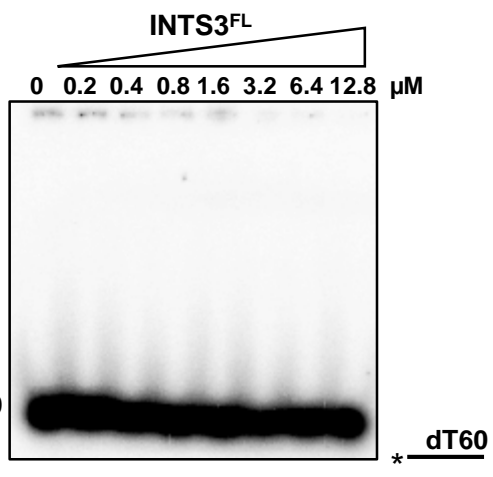**INTS3<sup>FL</sup>**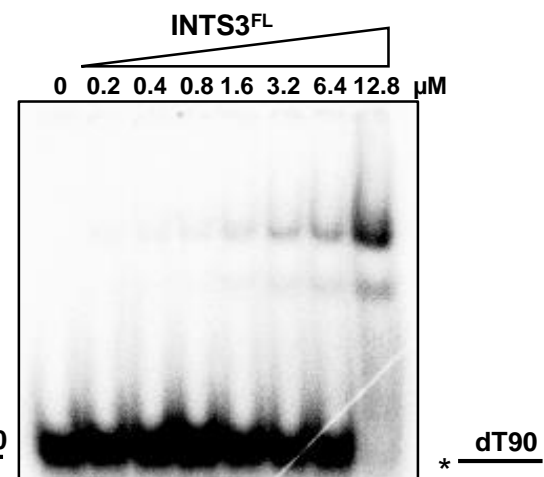**INTS3<sup>FL</sup>**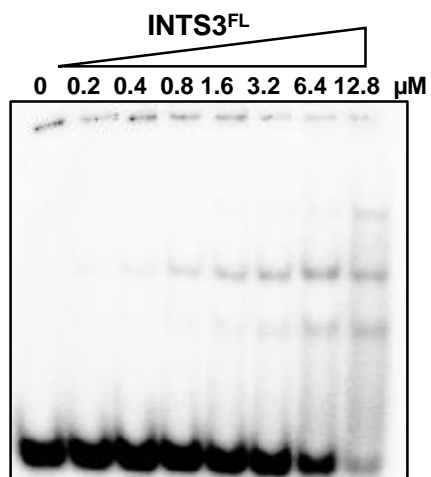**C**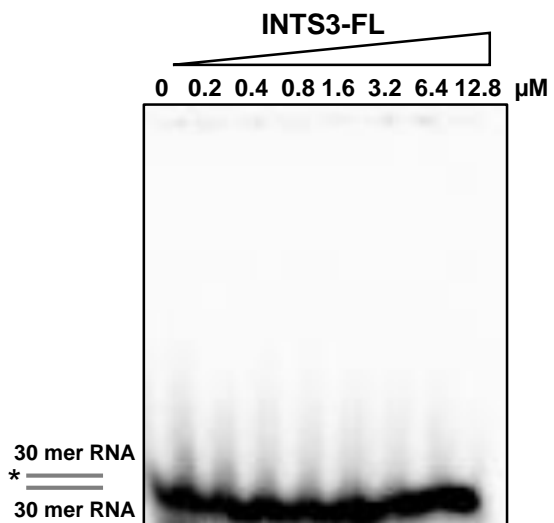**D**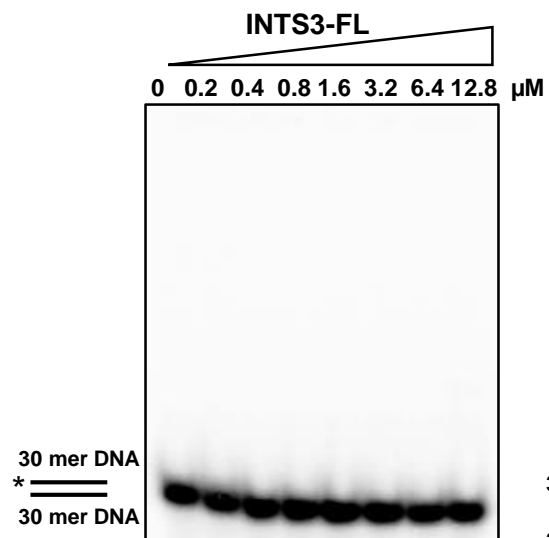**E**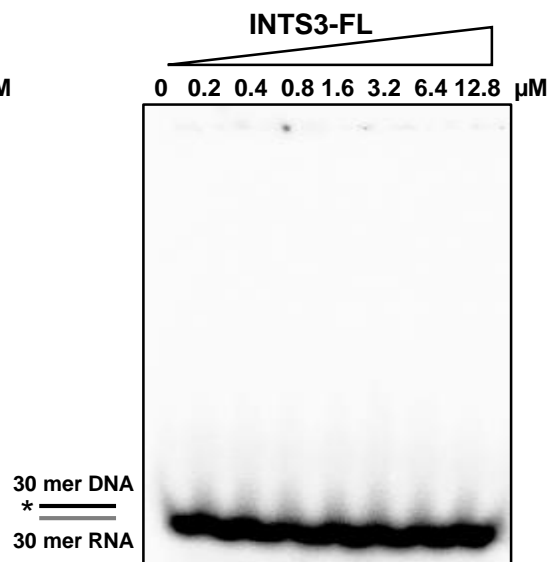**Fig. S3**

**Figure S3.** Representative EMSA images for INTS3 full length protein binding with random 30 mer ssRNA (**A**), various lengths of dT (10, 20, 60 and 90, **B**), dsRNA (**C**), dsDNA (**D**), or DNA:RNA hybrid (**E**).



**A**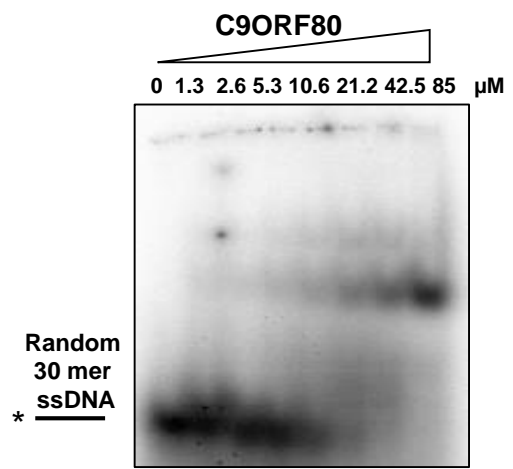**B**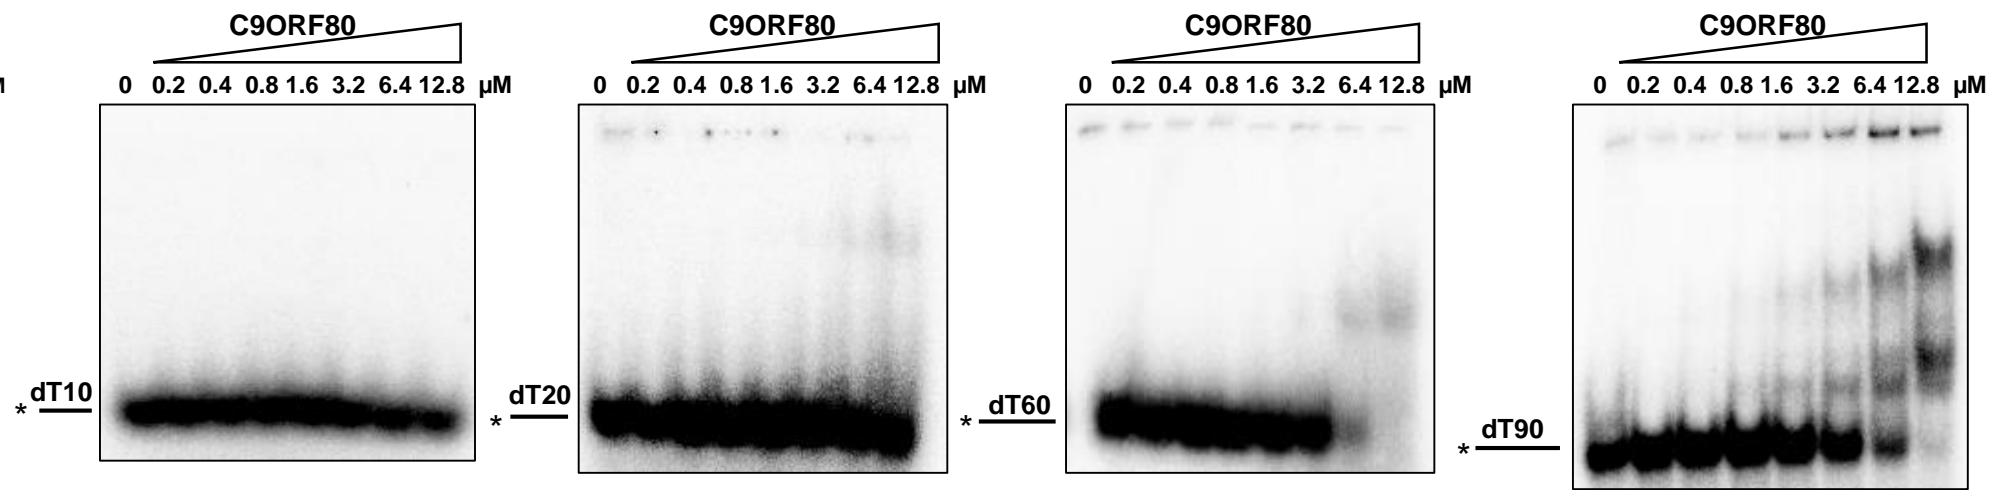**C**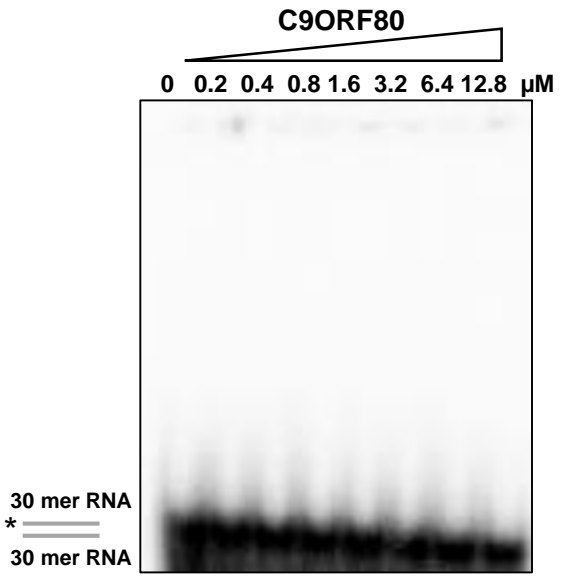**D**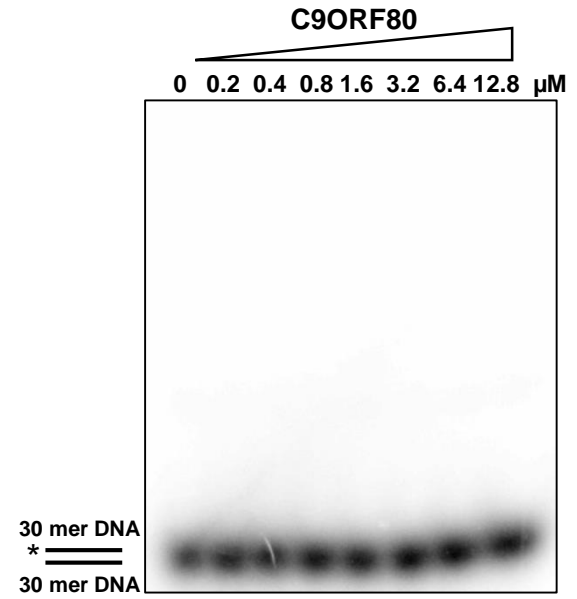**E**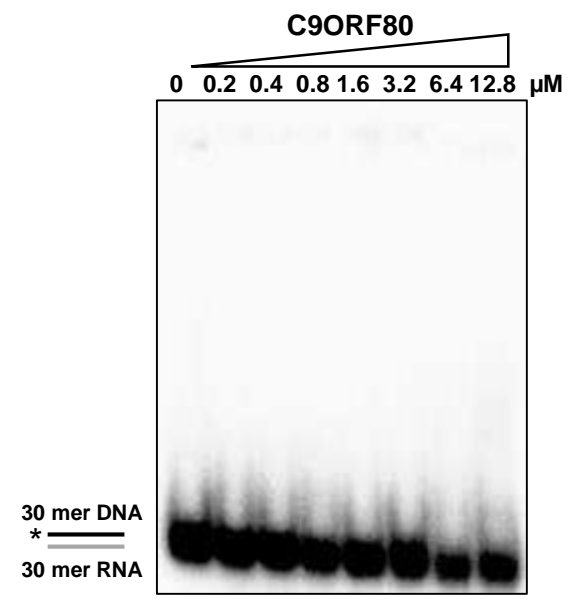**Fig. S5**



**Figure S5.** Representative EMSA images for increasing protein concentration of C9ORF80 protein binding with random 30 mer ssDNA (**A**), various lengths of dT (10, 20, 60 and 90, **B**), dsRNA (**C**), dsDNA (**D**), or DNA: RNA hybrid (**E**).

Sequence: MELQKGKGAATAAASGAAGGGGGGAGAGAPGGGRLLLSTSLDAKDELEERLERCMSIVT  
 Prediction: -----+-----+-----++-----+-----  
 Confidence: 847274823332444722211116111111762394452214551577674966862763

Sequence: SMTAGVSEREANDALNAYVCKGLPQHEEICLGLFTLILTEPAQAQKCYRDLALVSRDGMN  
 Prediction: -----+-----+-----+---+-----+-----  
 Confidence: 352215126462577373866555477898999939994454647831687567374753

Sequence: IVLNKINQILMEKYLKLDTCRTQLVWLVRELVKSGVLGADGVCMTFMKQIAGGDVTAKN  
 Prediction: -----+-----+-----  
 Confidence: 888639438998549262224723964992797125754766877589369845366614

Sequence: IWLAEVLDILTEQREWVLKSSILIAMAVYTYLRLIVDHHGTAQLQALRQKEVDFCISLL  
 Prediction: -----+-----+-----  
 Confidence: 948966996963763645815488887993339299986651613636653584899379

Sequence: RERFMECLMIGRDLVRLQNVARIPEFELLWKDI IHNPQALSPQFTGILQLLQSRTRSKE  
 Prediction: -----+-----+-----+-----+-----  
 Confidence: 283997999991788199348978689699769996762651547279936621987961

Sequence: LACRLTPDMETKLLFMTSRVRFQKRYQDFQRYLSTPDSQSLRCDLIRYICGVVHPS  
 Prediction: -----+-----+-----+-----+-----+-----  
 Confidence: 557183457523874522868668178121155242566218864824791698869453

Sequence: NEVLSSDILPRWAIIGWLLTTCTSNVAASNAKLALFYDWLFFSPDKDSIMNIEPAILVMH  
 Prediction: -----+-----+-----+-----  
 Confidence: 446523478638999989833521654361566889899998666353786987999997

Sequence: HSMKPHPAITATLLDFMCRIIPNFYPPLEGHVRQGVFSSLNHIVEKRVLAHLAPLFDNPK  
 Prediction: -----+-----+-----  
 Confidence: 535162357273996999399669566844386256523963688539865996886441

Sequence: LDKELRAMLREKFPEFCSSPSPVEVKIEEPVSMEMDNHMSDKDESCYDNAEAAFSDDDE  
 Prediction: -----+-----+-----+-----+-----  
 Confidence: 631587548163864742111225372984783768734624244152648566536775

Sequence: DLNSKGGKREFRFHPIKETVVEEPPVDITPYLDQDESRLRDKVLQQLKGSDETAQCEVMQE  
 Prediction: -----+-----+-----+-----+-----  
 Confidence: 451697999637564937699898989463995955376537837364131263889979

Sequence: IVDQVLEEDFDSEQLSVLASCLQELFKAHFRGEVLP EEITEESLEESVKGPLYLIFRNLC  
 Prediction: -----+-----+-----+-----+-----  
 Confidence: 999899998774838288627946972737165975889468486446716918993698

Sequence: QMQEDNSSFSLLLDLLSELYQKQPKIGYHLLYYLRASKAAAGKMNLYESFAQATQLGDLH  
 Prediction: -----+-----+-----+-----+-----  
 Confidence: 363551225289999945823622756159844967173222742636569473374395

Sequence: TCLMMDMKACQEDDVRLCHLTPSIYTEFPDET LRSGELLNMIVAVIDSAQLQELVCHVM  
 Prediction: -----+-----+-----+-----+-----  
 Confidence: 389899937746759297879343832486554773557859999996363956999798

**Fig. S6**

```

Sequence:      MGNLVMFRKDSVLNLIQSLDWETFEQYCAWQLFLAHNIPLLETIIPILQHLKYKEHPEAL
Prediction:    -----
Confidence:    896886734737849994376564886589689999778597499899557122532577

Sequence:      SCLLLQLRREKPSSEEMVKMVLSPCHPDDQFTTSSILRHWCMKHDELLAEHIKSLLIKNNNS
Prediction:    -----++-+-----+-----+-----+
Confidence:    379771667162136792898373533554621279144884997989969226671317

Sequence:      LPRKRQSLRSSSSKLAQLTLEQILEHLDNLRNLNTNTKQNFSSQTPILQALQHVQASCDE
Prediction:    -+++++-----+--+-----
Confidence:    168898969887773418498699989649771367112126344786399669373653

Sequence:      AHKMKFSDLFSLAEYEDSSTKPPKSRKAALSSPRSRKNATQPPNAEEESGSSSAESEE
Prediction:    -----+++++-----+++++-----+++-----
Confidence:    52282735985798634317899999997119899899968821132321287721112

Sequence:      DTKPKPTKRKRKGSSAVGSDSD
Prediction:    -+++++-----+----
Confidence:    268699999998981116214

```

\*\*\* Prediction: binding residues are labeled with '+' and in red;  
non-binding residues labeled with '-' and in green.  
\*\*\* Confidence: from level 0 (lowest) to level 9 (highest).

## Fig. S6 (cont'd)

**Figure S6.** Prediction of INTS3 protein binding with ssDNA using BindN with 90% expected specificity.

**A**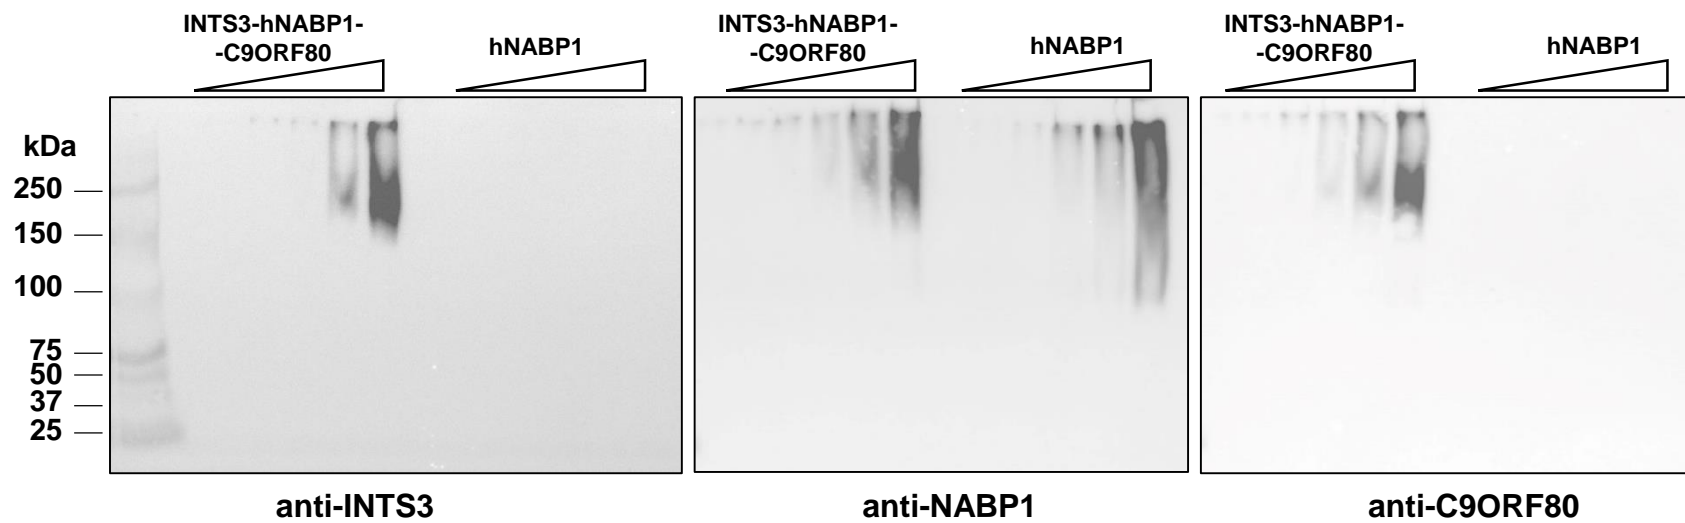**B**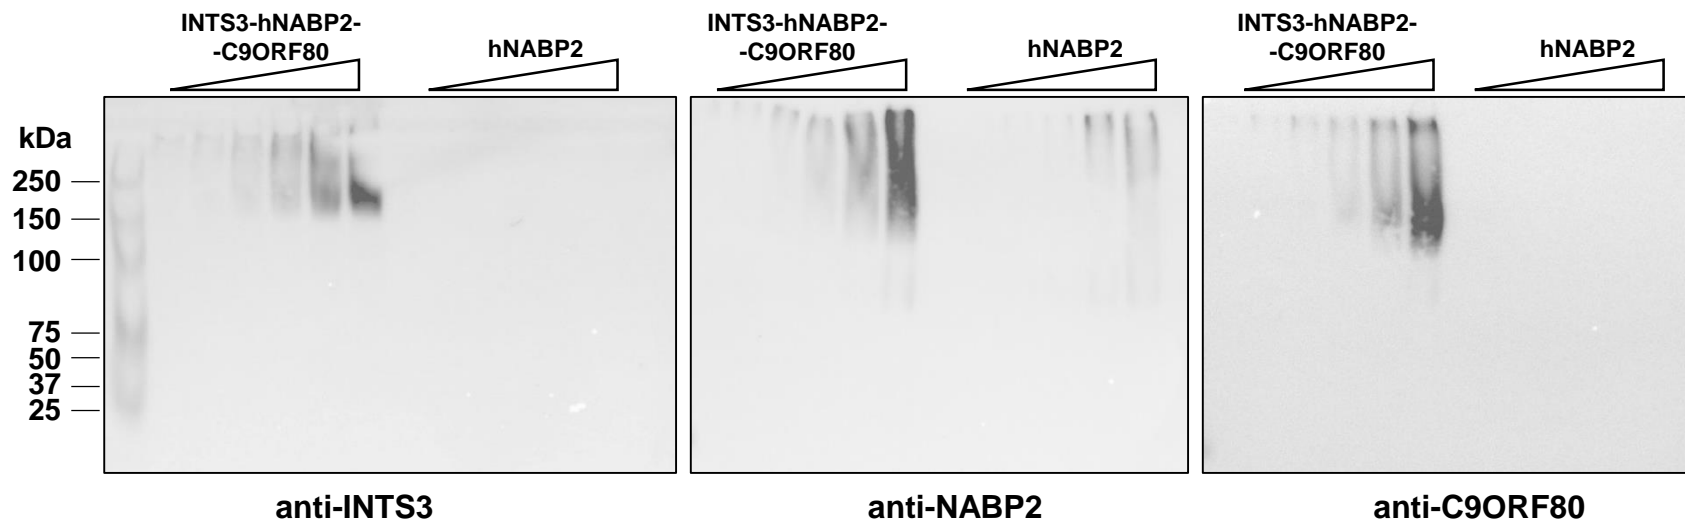**Fig. S7**

**Figure S7.** Western blot detection of individual protein with indicated antibodies in the INTS3<sup>FL</sup>-hNABP1-C9ORF80 complex binding with dT<sub>30</sub>(**A**), and INTS3<sup>FL</sup>-hNABP2-C9ORF80 complex with rU<sub>30</sub> (**B**).

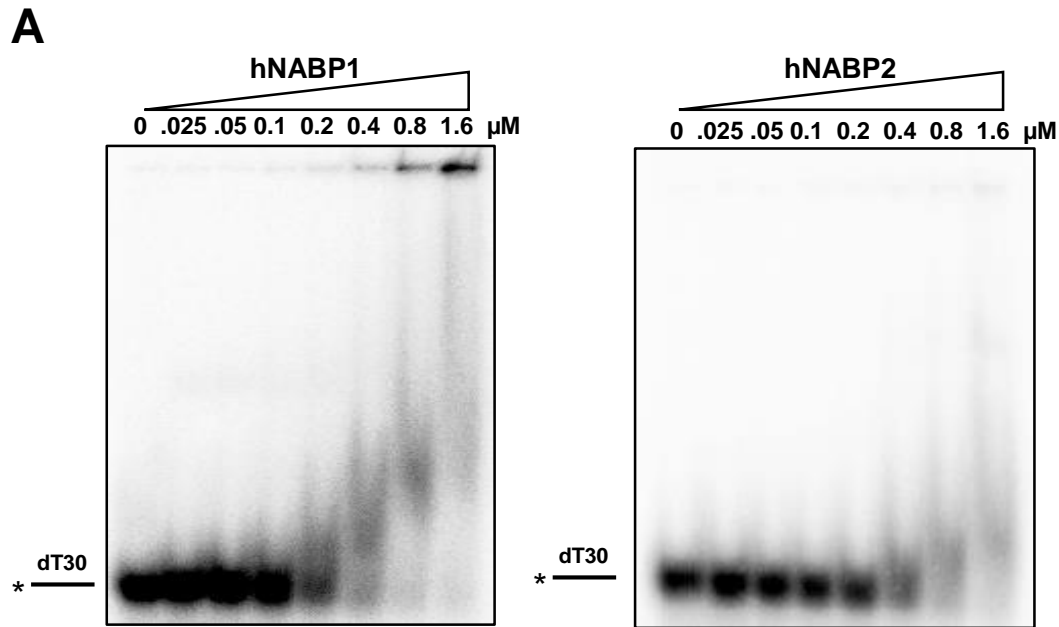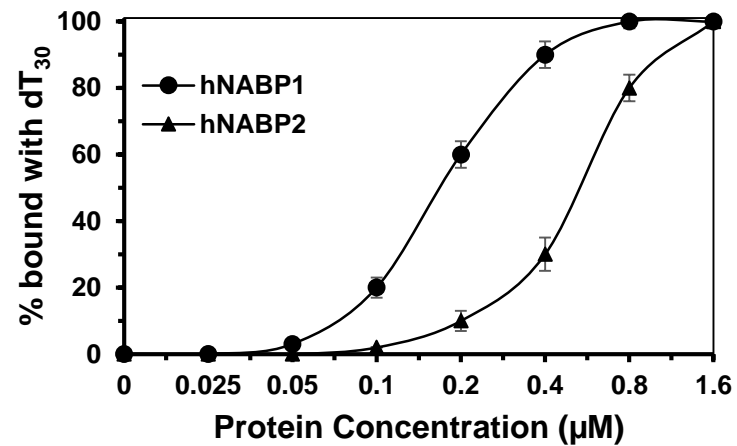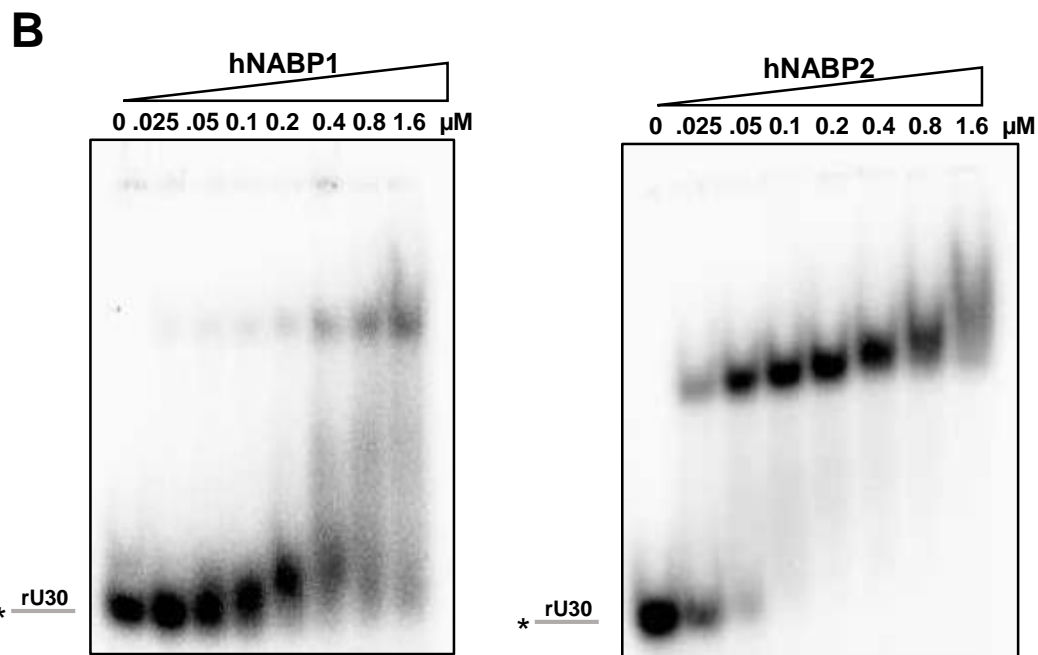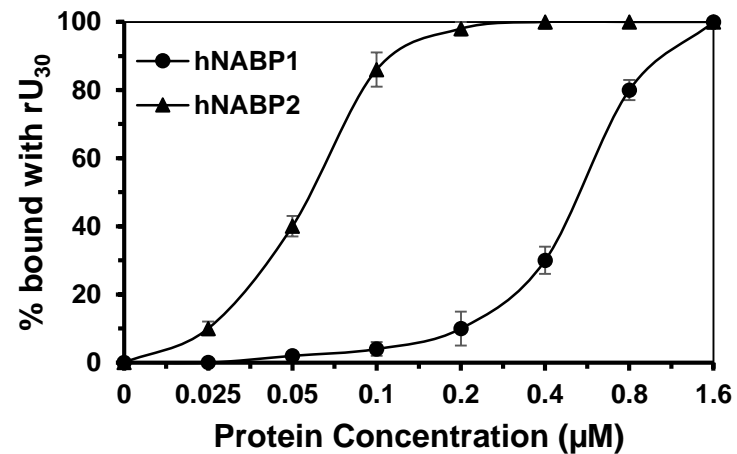

**Fig. S8**

**Figure S8.** Representative EMSA images for hNABP1 and hNABP2 binding with dT<sub>30</sub> (**A**) and rU<sub>30</sub> (**B**), and their quantitative analysis (right).

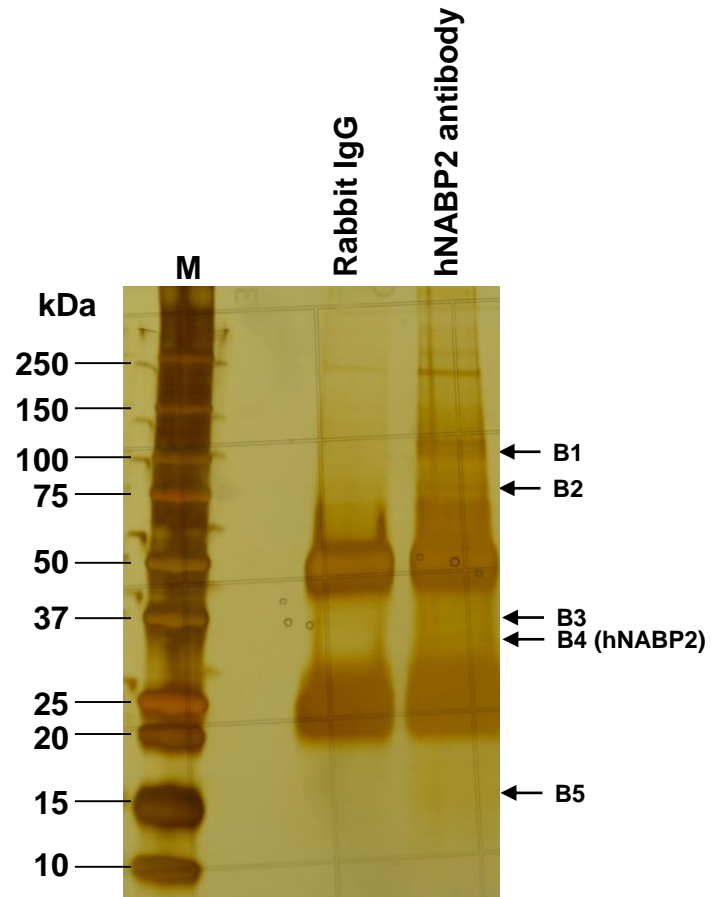

**Figure S9.** Silver staining of immunoprecipitated proteins using a hNABP2 antibody and rabbit IgG. Samples were separated on a gradient (4-20%) SDS-PAGE gel. M: protein marker. The excised bands are indicated as B1-5.
